# Supplementary material for: Prognostic Factors in Patients with Septic Disseminated Intravascular Coagulation Treated with Thrombomodulin: The Effect of Reduced Thrombomodulin Dose; a Single-center, Retrospective, Observational Study
Source: Research Square preprint supplement (doi:10.21203/rs.3.rs-1027874/v1), 2021-11-01
Supplement: Supplementary file 1 [file 3473d6e7615e6e47742fc5d4.xlsx]

## Sheet: Table1
Table 1 Patients' baseline characteritics
	Total (N = 102)
Patient characteritics
Age, years	76 (67-83)
Male sex	58 (56.9)
Height, cm	1.58 (1.50-1.65)
Weight, kg	54.0 (44.8-63.8)
Body mass index	21.7 (19.1-25.1)
Creatinine clearance, mL/min	21.31 (12.35-39.85)
Severe renal dysfunction	54 (52.9)
Blood urea nitrogen, mg/dL	39.0 (27.3-57.8)
Renal replacement therapy	55 (53.9)
Malignancy	22 (21.6)
Serum albumin, mg/dL	2.35 (1.92-2.70)
C reaction protein, mg/dL	16.99 (9.32-24.10)
Illnes severity
SOFA score	11 (9-14)
JAAM-DIC score	6 (5-7)
SIRS criteria	3 (2-4)
Primary type of Infection
Intra-abdominal infection	25 (24.5)
Pneumonia	23 (22.5)
Urinary tract infection	17 (16.7)
Cholangitis/Cholecystitis	9 (8.8)
Blood stream infection	7 (6.9)
Infectious enteritis	2 (2.0)
Necrotizing fasciitis/Gas gangrene	2 (2.0)
Osteomyelitis	2 (2.0)
Iliopsoas muscle abscess/Retroperitoneal abscess	2 (2.0)
Othersa	4 (3.9)
Unknown	9 (8.8)
Treatment
Dose reduction of TM alfa	30 (29.4)
Duration of TM alfa administration	6 (4-6)
Antibiotics	102 (100.0)
Antithrombin Ⅲ	78 (76.5)
Heparin	3 (2.9)
Fresh frozen plasma	29 (28.4)
Platelet Concentrate	37 (36.3)
PMX-DHP	48 (47.1)
Clinical outcomes
DIC resolution up to day 7	55 (53.9)
All-cause mortality at 30 days	30 (29.4)
Bleeding complications	13 (12.7)
Data are presented as median (interquartile range) or number (%)
SOFA Sequential organ failure assessment, JAAM-DIC Japanese Association for Acute Medicine DIC diagnostic criteria, DIC disseminated intravascular coagulation, SIRS Systemic inflammatory response syndrome, PMX-DHP Polymyxin B immobilized fiber column direct hemoperfusion
aPulmonary abscess, Subcutaneous abscess, Incision infection, severe pancreatitis

## Sheet: Table2
Table 2 Baseline Patient's Characteristics Stratified by DIC resolution
	DIC resolution
	Yes (N = 55)	No (N = 47)	p value
Patient characteritics
Age, years	76 (66-84)	78 (69-83)	0.392a
Male sex	23 (41.8)	35 (74.5)	0.002b
Body mass index	21.7 (19.2-25.7)	21.7 (18.8-24.4)	0.582a
Creatinine clearance, mL/min	26.5 (13.1-49.1)	15.6 (11.8-31.0)	0.046a
Renal replacement therapy	24 (43.6)	31 (66.0)	0.040b
Malignancy	10 (18.2)	13 (25.5)	0.510b
Serum albumin, mg/dL	2.4 (2.0-2.8)	2.3 (2.0-2.7)	0.294a
Illnes severity
SOFA score	9 (8-12)	13 (10-16)	<0.001a
JAAM-DIC score	5 (5-7)	6 (5-8)	0.053a
SIRS criteria	3 (2-4)	3 (3-4)	0.199a
Primary type of Infection
Intra-abdominal infection	16 (29.1)	9 (19.1)	0.260c
Pneumonia	6 (10.9)	17 (36.2)	0.004c
Urinary tract infection	11 (20.0)	6 (12.8)	0.427c
Cholangitis/Cholecystitis	9 (16.4)	0 ( 0.0)	0.003c
Blood stream infection	3 ( 5.5)	4 ( 8.5)	0.701c
Infectious enteritis	2 ( 3.6)	0 ( 0.0)	0.498c
Necrotizing fasciitis/Gas gangrene	1 ( 1.8)	1 ( 2.1)	1.000c
Osteomyelitis	2 ( 3.6)	0 ( 0.0)	0.498c
Iliopsoas muscle abscess/Retroperitoneal abscess	1 ( 1.8)	1 ( 2.1)	1.000c
Unknown	2 ( 3.6)	7 (14.9)	0.077c
Treatment
Dose reduction of TM alfa	9 (16.4)	21 (44.7)	0.002c
Antithrombin Ⅲ	40 (72.7)	38 (80.9)	0.360c
Heparin	1 (1.8)	2 (4.3)	0.594c
Fresh frozen plasma	18 (38.3)	11 (20.0)	0.049b
Platelet Concentrate	15 (27.3)	22 (46.8)	0.066b
PMX-DHP	28 (50.9)	20 (42.6)	0.520b
Data are presented as median (interquartile range) or number (%)
SOFA Sequential organ failure assessment, JAAM-DIC Japanese Association for Acute Medicine DIC diagnostic criteria, DIC disseminated intravascular coagulation, SIRS Systemic inflammatory response syndrome, PMX-DHP Polymyxin B immobilized fiber column direct hemoperfusion
aMann-Whitney U test
bChi-square test
cFisher's exact test

## Sheet: Table3
Table 3 Multivariable logistic regression analyses for DIC resolution
	OR (95% CI)	p value
SOFA score	0.76 (0.66-0.89)	<0.001
Pneumonia	0.24 (0.08-0.75)	0.014
Dose reduction of TM alfa	0.23 (0.08-0.66)	0.006
OR odds ratio, CI confidence interval, SOFA Sequential organ failure assessment

## Sheet: Table4
Table 4 Baseline Patient's Characteristics Stratified by All-cause mortality at 30 days
	All-cause mortality at 30 days
	Yes (N = 30)	No (N = 72)	p value
Patient characteritics
Age, years	74 (69-80)	77 (67-84)	0.683a
Male sex	21 (70.0)	37 (51.4)	0.124c
Body mass index	21.4 (17.0-24.2)	21.7 (19.2-25.5)	0.352a
Creatinine clearance, mL/min	21.3 (12.7-29.4)	20.6 (12.4-42.6)	0.523a
Renal replacement therapy	20 ( 66.7)	35 (48.6)	0.147b
Malignancy	8 ( 26.7)	14 (19.4)	0.437c
Serum albumin, mg/dL	2.15 (1.90-2.50)	2.45 (2.08-2.73)	0.093a
Illnes severity
SOFA score	15 (12-17)	10 (8-12)	<0.001a
JAAM-DIC score	6 (5-7)	6 (5-7)	0.448a
SIRS criteria	3 (2-4)	3 (2-4)	0.832a
Primary type of Infection
Intra-abdominal infection	4 (13.3)	21 (29.2)	0.129c
Pneumonia	14 (46.7)	9 (12.5)	<0.001c
Urinary tract infection	2 ( 6.7)	15 (20.8)	0.142c
Cholangitis/Cholecystitis	0 ( 0.0)	9 (12.5)	0.055c
Blood stream infection	3 (10.0)	4 ( 5.6)	0.417c
Infectious enteritis	0 ( 0.0)	2 ( 2.8)	1.000c
Necrotizing fasciitis/Gas gangrene	0 ( 0.0)	2 ( 2.8)	1.000c
Iliopsoas muscle abscess/Retroperitoneal abscess	0 ( 0.0)	2 ( 2.8)	1.000c
Osteomyelitis	1 ( 3.3)	1 ( 1.4)	0.504c
Unknown	5 (16.7)	4 ( 5.6)	0.119c
Treatment
Dose reduction of TM alfa	14 (46.7)	16 (22.2)	0.026b
Antithrombin Ⅲ	26 ( 86.7)	52 (72.2)	0.133c
Heparin	1 ( 3.3)	2 ( 2.8)	1.000c
Fresh frozen plasma	11 ( 36.7)	18 (25.0)	0.342b
Platelet Concentrate	12 ( 40.0)	25 (34.7)	0.780b
PMX-DHP	8 ( 26.7)	40 (55.6)	0.009c
Data are presented as median (interquartile range) or number (%)
SOFA Sequential organ failure assessment, JAAM-DIC Japanese Association for Acute Medicine DIC diagnostic criteria, DIC disseminated intravascular coagulation, SIRS Systemic inflammatory response syndrome, PMX-DHP Polymyxin B immobilized fiber column direct hemoperfusion
aMann-Whitney U test
bChi-square test
cFisher's exact test

## Sheet: Table5
Table 5 Multivariable logistic regression analyses for All-cause mortality at 30 days
	OR (95% CI)	p value
SOFA score	1.66 (1.31-2.09)	<0.001
Pneumonia	9.50 (2.49-36.25)	0.001
Dose reduction of TM alfa	3.52 (1.06-11.69)	0.04
OR odds ratio, CI confidence interval, SOFA Sequential organ failure assessment

## Sheet: Table6
Table 6 Details of Bleeding complications
Details	N = 13
Subcutaneous bleeding	3 (23.1)
Mouth hemorrhage	3 (23.1)a
Gastrointestinal hemorrhage	3 (23.1)b
Bleeding at the site of vascular access	2 (15.4)
Urinary hemorrhage	1 (7.7)a
Nasal hemorrhage	1 (7.7)
Alveolar hemorrhage	1 (7.7)
asame
bone case serious bleeding

## Sheet: Table7
Table 7 Baseline Patient's Characteristics Stratified by Bleeding complications
	Bleeding complications
	Yes (N = 13)	No (N = 89)	p value
Patient characteritics
Age, years	71 (59-80)	77 (68-83)	0.164a
Male sex	8/5	50/39	0.773c
Body mass index	20.2 (18.1-21.8)	22.0 (19.2-25.5)	0.074a
Creatinine clearance, mL/min	14.1 (12.3-39.9)	22.3 (12.4-39.7)	0.479a
Renal replacement therapy	7 ( 53.8)	48 (53.9)	1.000c
Malignancy	3 ( 23.1)	19 (21.3)	1.000c
Serum albumin, mg/dL	2.40 (2.10-2.50)	2.30 (1.90-2.70)	0.687a
Illnes severity
SOFA score	13 (9-14)	11 (9-14)	0.453a
JAAM-DIC score	6 (5-7)	6 (5-7)	0.723a
SIRS criteria	3 (3-4)	3 (2-4)	0.566a
Primary type of Infection
Intra-abdominal infection	3 (23.1)	22 (24.7)	1.000c
Pneumonia	4 (30.8)	19 (21.3)	0.483c
Urinary tract infection	1 ( 7.7)	16 (18.0)	0.690c
Cholangitis/Cholecystitis	0 ( 0.0)	9 (10.1)	0.599c
Blood stream infection	0 ( 0.0)	7 ( 7.9)	0.591c
Infectious enteritis	2 (15.4)	0 ( 0.0)	0.015c
Necrotizing fasciitis/Gas gangrene	0 ( 0.0)	2 ( 2.2)	1.000c
Iliopsoas muscle abscess/Retroperitoneal abscess	0 ( 0.0)	2 ( 2.2)	1.000c
Osteomyelitis	0 ( 0.0)	2 ( 2.2)	1.000c
Unknown	3 (23.1)	6 ( 6.7)	0.087c
Treatment
Dose reduction of TM alfa	3 ( 23.1)	27 (30.3)	0.751c
Antithrombin Ⅲ	11 ( 84.6)	67 (75.3)	0.728c
Heparin	0 ( 0.0)	3 ( 3.4)	1.000c
Fresh frozen plasma	6 ( 46.2)	23 (25.8)	0.186c
Platelet Concentrate	6 ( 46.2)	31 (34.8)	0.539c
PMX-DHP	5 ( 38.5)	43 (48.3)	0.564c
Data are presented as median (interquartile range) or number (%)
SOFA Sequential organ failure assessment, JAAM-DIC Japanese Association for Acute Medicine DIC diagnostic criteria, DIC disseminated intravascular coagulation, SIRS Systemic inflammatory response syndrome, PMX-DHP Polymyxin B immobilized fiber column direct hemoperfusion
aMann-Whitney U test
bChi-square test
cFisher's exact test
